# Supplementary material for: Prokaryotic gene-family size correlations
Source: Preprints.org preprint supplement (doi:10.20944/preprints201607.0096.v1), 2016-07-29
Supplement: Supplementary file 3 [file supplementary]

Supplementary Materials: Gene-Family Extension Measures and Correlations

Gon Carmi and Alexander Bolshoy

**Table S1.** Complete list of atypical genomes according to average number of paralogs 1.

| **Rank** | **Ave** | **Size (Mb)** | **Atypical Genomes** |
| --- | --- | --- | --- |
| 246.8 | 1.521 | 0.853 | Onion_yellows_phytoplasma_OY_M_uid58015 |
| 66.8 | 1.835 | 2.009 | *Orientia_tsutsugamushi*_Ikeda_uid58869 |
| 1225.1 | 1.915 | 2.809 | *Halalkalicoccus_jeotgali*_B3_uid50305 |
| 1233.4 | 1.936 | 2.821 | *Halogeometricum_borinquense*_DSM |
| 1235.3 | 2.008 | 2.848 | *Haloferax volcanii*_DS2_uid46845 |
| 1091.1 | 1.878 | 2.914 | *Halophilic archaeon*_DL31_uid72619 |
| 1131.5 | 1.987 | 2.992 | *Sulfolobus solfataricus*_P2_uid57721 |
| 1073.9 | 2.012 | 3.155 | *Renibacterium salmoninarum*_ATCC_33209 |
| 1417.6 | 2.447 | 3.311 | Azospirillum_B510_uid46085 |
| 1240.8 | 2.067 | 3.420 | *Haloarcula marismortui*_ATCC_43049_uid57719 |
| 1426.9 | 2.469 | 3.654 | *Sinorhizobium meliloti*_1021_uid57603 |
| 1306.5 | 2.071 | 3.668 | *Halopiger xanaduensis*_SH_6_uid68105 |
| 1260.9 | 2.036 | 3.752 | *Natrialba magadii*_ATCC_43099_uid46245 |
| 1401.9 | 2.407 | 3.782 | *Sinorhizobium medicae*_WSM419_uid58549 |
| 1419.5 | 2.378 | 3.889 | *Haloterrigena turkmenica*_DSM_5511 |
| 1115.8 | 2.111 | 3.911 | Novosphingobium_PP1Y_uid67383 |
| 1425.8 | 2.452 | 3.926 | Rhizobium_NGR234_uid59081 |
| 1403.3 | 2.394 | 3.928 | *Cupriavidus metallidurans*_CH34_uid57815 |
| 385.4 | 1.374 | 4.171 | *Sodalis glossinidius morsitans*__uid58553 |
| 1346.8 | 2.200 | 4.369 | Pantoea_At_9b_uid55845 |
| 1399.1 | 2.392 | 4.382 | *Rhizobium etli*_CFN_42_uid58377 |
| 1483 | 2.677 | 4.494 | *Candidatus* Cloacamonas acidaminovorans_Evry |
| 1383.1 | 2.276 | 4.513 | *Rhizobium etli*_CIAT_652_uid59115 |
| 1402.4 | 2.501 | 4.538 | *Rhizobium leguminosarum bv trifolii*_WSM2304 |
| 1313.8 | 2.186 | 4.598 | *Arthrobacter aurescens*_TC1_uid58109 |
| 948.4 | 2.228 | 4.644 | Mycobacterium_JDM601_uid67369 |
| 1267 | 2.192 | 4.654 | *Spirochaeta smaragdinae*_DSM_11293_uid51369 |
| 1059.1 | 2.175 | 4.669 | *Beutenbergia cavernae*_DSM_12333_uid59047 |
| 1341.9 | 2.202 | 4.699 | Arthrobacter_FB24_uid58141 |
| 1430.8 | 2.614 | 4.767 | *Rhizobium leguminosarum bv trifolii*_WSM1325 |
| 1074.7 | 2.277 | 4.830 | *Mycobacterium avium paratuberculosis*_K_10 |
| 1328.2 | 2.229 | 4.972 | Agrobacterium_H13_3_uid63403 |
| 1345 | 2.241 | 4.986 | Nocardioides_JS614_uid58149 |
| 1331.3 | 2.247 | 5.010 | *Agrobacterium vitis*_S4_uid58249 |
| 1278 | 2.244 | 5.043 | *Rhodococcus equi*_103S_uid60171 |
| 1452 | 2.685 | 5.057 | *Rhizobium leguminosarum bv viciae*_3841 |
| 1211.8 | 2.293 | 5.067 | *Mycobacterium abscessus*_uid61613 |
| 1368.9 | 2.274 | 5.200 | Polaromonas_JS666_uid58207 |
| 1277.9 | 2.287 | 5.288 | *Bordetella petrii*_uid61631 |
| 1268 | 2.334 | 5.339 | *Bordetella bronchiseptica*_RB50_uid57613 |
| 710.1 | 1.621 | 5.355 | *Nostoc azollae*__0708_uid49725 |
| 1284.3 | 2.468 | 5.382 | *Sphingomonas wittichii*_RW1_uid58691 |
| 1074.9 | 2.495 | 5.475 | *Mycobacterium avium*_104_uid57693 |
| 1275.8 | 2.399 | 5.548 | *Mycobacterium gilvum*_Spyr1_uid61403 |
| 1112.2 | 2.365 | 5.567 | *Verminephrobacter eiseniae*_EF01_2_uid58675 |
| 1303.6 | 2.491 | 5.620 | *Mycobacterium gilvum*_PYR_GCK_uid59421 |
| 1306.9 | 2.483 | 5.705 | Mycobacterium_MCS_uid58465 |
| 1320.9 | 2.567 | 5.737 | Mycobacterium_KMS_uid58491 |
| 1319.4 | 2.582 | 6.048 | Mycobacterium_JLS_uid58489 |
| 1469.2 | 2.681 | 6.177 | *Burkholderia phymatum*_STM815_uid58699 |
| 860.6 | 1.827 | 6.196 | *Pirellula staleyi*_DSM_6068_uid43209 |
| 1465.6 | 2.866 | 6.283 | *Streptomyces cattleya*_NRRL_8057_DSM_46488 |
| 1402.8 | 2.761 | 6.359 | *Conexibacter woesei*_DSM_14684_uid43467 |
| 1435.8 | 2.700 | 6.516 | *Rhodococcus erythropolis*_PR4_uid59019 |
| 1471 | 2.940 | 6.558 | *Cupriavidus necator*_N_1_uid68689 |
| 1436.7 | 2.707 | 6.656 | *Agrobacterium radiobacter*_K84_uid58269 |
| 1449.2 | 2.938 | 6.988 | *Mycobacterium smegmatis*_MC2_155_uid57701 |
| 1403.9 | 2.779 | 7.013 | *Achromobacter xylosoxidans*_A8_uid59899 |
| 1464.6 | 2.952 | 7.097 | *Pseudonocardia dioxanivorans*_CB1190 |
| 1341.4 | 2.024 | 7.215 | *Hahella chejuensis*_KCTC_2396_uid58483 |
| 1057.6 | 1.961 | 7.750 | *Trichodesmium erythraeum*_IMS101_uid57925 |
| 1478.2 | 3.435 | 7.805 | *Rhodococcus jostii*_RHA1_uid58325 |
| 1474.4 | 3.344 | 7.913 | *Rhodococcus opacus*_B4_uid13791 |
| 1422.8 | 3.113 | 8.816 | *Frankia EuI* 1c_uid42615 |
| 1411 | 2.370 | 9.004 | *Myxococcus fulvus*_HW_1_uid68443 |
| 1319.3 | 2.349 | 9.446 | *Haliangium ochraceum*_DSM_14365_uid41425 |
| 1477.8 | 3.463 | 10.237 | *Amycolatopsis mediterranei*_U32_uid50565 |

1 p.i.—paralog index, *Rank*—is an averaged rank calculated for multiple runs of theS-ranking procedure. Genomes are sorted by ascending size of genome for easier comparison with Figure 2.

**Table S2.** Complete list of atypical genomes according to *S-Rank*.

| **Rank** | **Size** | **Atypical Genomes** | **K** |  |
| --- | --- | --- | --- | --- |
| 622.8 | 1.591 | *Candidatus* Korarchaeum cryptofilum_OPF8 | A | Crenarchaeota |
| 791.4 | 1.782 | *Thermofilum pendens*_Hrk_5_uid58563 | A | Crenarchaeota |
| 792.6 | 1.842 | *Thermoproteus tenax*_Kra_1_uid74443 | A | Crenarchaeota |
| 808.9 | 1.846 | *Thermococcus sibiricus*_MM_739_uid59399 | A |  |
| 754.3 | 1.908 | *Pyrococcus furiosus*_DSM_3638_uid57873 | A |  |
| 804.9 | 1.936 | *Thermoproteus uzoniensis*_768_20_uid65089 | A | Crenarchaeota |
| 803.4 | 2.001 | *Halobacterium salinarum*_R1_uid61571 | A |  |
| 792.7 | 2.010 | *Thermococcus barophilus*_MP_uid54733 | A |  |
| 790.5 | 2.011 | Thermococcus_4557_uid70841 | A |  |
| 811.5 | 2.014 | Halobacterium_NRC_1_uid57769 | A |  |
| 753.2 | 2.045 | *Thermococcus gammatolerans*_EJ3_uid59389 | A |  |
| 875.7 | 2.046 | *Ilyobacter polytropus*_DSM_2926_uid59769 | B |  |
| 797.8 | 2.121 | *Pyrobaculum arsenaticum*_DSM_13514_uid58409 | A |  |
| 38.3 | 2.127 | *Orientia tsutsugamushi_*Boryong_uid61621 | B |  |
| 836.2 | 2.192 | *Metallosphaera sedula*_DSM_5348_uid58717 | A | Crenarchaeota |
| 1225.1 | 2.809 | *Halalkalicoccus jeotgali*_B3_uid50305 | A |  |
| 1233.4 | 2.821 | *Halogeometricum borinquense*_DSM_11551 | A |  |
| 1235.3 | 2.848 | *Haloferax volcanii*_DS2_uid46845 | A |  |
| 1091.1 | 2.914 | *Halophilic archaeon*_DL31_uid72619 | A |  |
| 1131.5 | 2.992 | *Sulfolobus solfataricus*_P2_uid57721 | A |  |
| 1133.9 | 3.218 | *Rhodobacter sphaeroides*_ATCC_17025_uid58451 | B |  |
| 1186.8 | 3.261 | *Halorubrum lacusprofundi*_ATCC_49239_uid58807 | A |  |
| 206.9 | 3.268 | *Mycobacterium leprae*_Br4923_uid59293 | B |  |
| 207.5 | 3.268 | *Mycobacterium leprae*_TN_uid57697 | B |  |
| 1417.6 | 3.311 | Azospirillum_B510_uid46085 | B |  |
| 1240.8 | 3.420 | *Haloarcula marismortui*_ATCC_43049_uid57719 | A |  |
| 1235 | 3.484 | *Haloarcula hispanica*_ATCC_33960_uid72475 | A |  |
| 1236.4 | 3.521 | *Ralstonia solanacearum*_PSI07_uid50539 | B |  |
| 1426.9 | 3.654 | *Sinorhizobium meliloti*_1021_uid57603 | B |  |
| 1306.5 | 3.668 | *Halopiger xanaduensis*_SH_6_uid68105 | A |  |
| 1239 | 3.716 | *Ralstonia solanacearum*_GMI1000_uid57593 | B |  |
| 1260.9 | 3.752 | *Natrialba magadii*_ATCC_43099_uid46245 | A |  |
| 504.6 | 3.769 | *Xanthomonas albilineans*_GPE_PC73_uid43163 | B |  |
| 1401.9 | 3.782 | *Sinorhizobium medicae*_WSM419_uid58549 | B |  |
| 1419.5 | 3.889 | *Haloterrigena turkmenica*_DSM_5511_uid43501 | A |  |
| 1425.8 | 3.926 | Rhizobium_NGR234_uid59081 | B |  |
| 1403.3 | 3.928 | *Cupriavidus metallidurans*_CH34_uid57815 | B |  |
| 385.4 | 4.171 | *Sodalis glossinidius morsitans*__uid58553 | B |  |
| 1399.1 | 4.382 | Rhizobium_etli_CFN_42_uid58377 | B |  |
| 1483 | 4.494 | *Candidatus*_Cloacamonas_acidaminovorans_Evry | B |  |
| 666.6 | 4.627 | *Leptospira interrogans serovar*_Copenhageni_Fiocruz | B |  |
| 769.9 | 4.970 | *Shewanella oneidensis*_MR_1_uid57949 | B |  |
| 710.1 | 5.355 | *Nostoc azollae*__0708_uid49725 | B |  |
| 852.8 | 5.473 | *Isosphaera pallida*_ATCC_43644_uid62207 | B |  |
| 860.6 | 6.196 | *Pirellula staleyi*_DSM_6068_uid43209 | B |  |
| 1057.6 | 7.750 | *Trichodesmium erythraeum*_IMS101_uid57925 | B |  |

**Table S3.** Paralogization indices of Shigella.

| ***Rank*** | ***Ave*** | ***Size*** | ***p.i.*** | ***mp*** | **Genome** |
| --- | --- | --- | --- | --- | --- |
| 893.2 | 1.80 | 4.6 | 0.26 | 0.43 | *Shigella boydii* CDC 3083 |
| 875.9 | 1.82 | 4.5 | 0.26 | 0.42 | *Shigella boydii* Sb227 |
| 879.9 | 1.90 | 4.4 | 0.25 | 0.39 | *Shigella dysenteriae* |
| 981.2 | 1.82 | 4.6 | 0.28 | 0.43 | *Shigella flexneri* 2a 2457T |
| 983.4 | 1.86 | 4.6 | 0.26 | 0.41 | *Shigella flexneri* 2a 301 |
| 981.2 | 1.79 | 4.6 | 0.28 | 0.43 | *Shigella flexneri* 5 8401 |
| 1008.1 | 1.88 | 4.8 | 0.28 | 0.43 | *Shigella sonnei* |

**Table S4.** Taxonomy of outliers.

| **Figure 1** | |
| --- | --- |
| Taxa | Occurrence |
| Aliivibrio | 1 |
| Brucella | 1 |
| Candidatus | 1 |
| Ehrlichia | 1 |
| Mycobacterium | 2 |
| Orientia | 1 |
| Prevotella | 1 |
| Sodalis | 1 |
| Treponema | 1 |
| Vibrio | 6 |

| **Figure 2** | | | |
| --- | --- | --- | --- |
| Taxa | Occurrence | Taxa | Occurrence |
| Nostoc | 1 | Orientia | 1 |
| Achromobacter | 1 | Pantoea | 1 |
| Agrobacterium | 3 | Pirellula | 1 |
| Amycolatopsis | 1 | Polaromonas | 1 |
| Arthrobacter | 2 | Pseudonocardia | 1 |
| Azospirillum | 1 | Renibacterium | 1 |
| Beutenbergia | 1 | Rhizobium | 6 |
| Bordetella | 2 | Rhodococcus | 4 |
| Burkholderia | 1 | Sinorhizobium | 2 |
| Candidatus | 1 | Sodalis | 1 |
| Conexibacter | 1 | Sphingomonas | 1 |
| Cupriavidus | 2 | Spirochaeta | 1 |
| Frankia | 1 | Streptomyces | 1 |
| Hahella | 1 | Sulfolobus | 1 |
| Halobacteriaceae | 9 | Trichodesmium | 1 |
| Mycobacteriaceae | 10 | Verminephrobacter | 1 |
| Myxococcus | 1 |  |  |
| Nocardioides | 1 |  |  |
| Novosphingobium | 1 |  |  |
| Phytoplasma | 1 |  |  |

| **Figure 3** | | | |
| --- | --- | --- | --- |
| Taxa | Occurrence | Taxa | Occurrence |
| Nostoc | 1 | Pirellula | 1 |
| Azospirillum | 1 | Ralstonia | 2 |
| Candidatus Cloacamonas | 1 | Rhizobium | 2 |
| Candidatus Korarchaeum | 1 | Rhodobacter | 1 |
| Cupriavidus | 1 | Shewanella | 1 |
| Halobacteriaceae | 12 | Sinorhizobium | 2 |
| Ilyobacter | 1 | Sodalis | 1 |
| Isosphaera | 1 | Sulfolobus | 1 |
| Leptospira | 1 | Thermococcaceae | 5 |
| Metallosphaera | 1 | Thermofilum | 1 |
| Mycobacterium leprae | 2 | Trichodesmium | 1 |
| Orientia | 1 | Xanthomonas | 1 |

| **Figure 4** | |
| --- | --- |
| Taxa | Occurrence |
| *Candidatus* cloacamonas | 1 |
| *Candidatus* Ruthia | 1 |
| Gardnerella | 1 |
| Haemophilus | 1 |
| Mycoplasmataceae | 8 |
| Neisseria | 5 |
| Phytoplasmas | 6 |
| Staphylothermus | 1 |
| Streptococcus | 1 |
| Sulfolobus | 2 |
| Thermosphaera | 1 |
| Treponema | 1 |

**Table S6.** Orientia tsutsugamushi and Rickettsias.

| ***Rank*** | ***Ave*** | **Genome Size** | **# of Genes** | ***p.i.*** | ***mp*** | **Strain** |
| --- | --- | --- | --- | --- | --- | --- |
| 38.3 | 1.4 | 2.1 | 1182 | 0.09 | 0.36 | *Orientia tsutsugamushi* Boryong |
| 66.8 | 1.8 | 2.0 | 1967 | 0.12 | 0.42 | *Orientia tsutsugamushi* Ikeda |
| 60.2 | 1.2 | 1.2 | 1257 | 0.11 | 0.22 | *Rickettsia akari* Hartford |
| 81.1 | 1.3 | 1.5 | 1475 | 0.13 | 0.34 | *Rickettsia bellii* OSU |
| 103.8 | 1.3 | 1.5 | 1429 | 0.16 | 0.29 | *Rickettsia bellii* RML369 |
| 40.6 | 1.1 | 1.2 | 1089 | 0.09 | 0.21 | *Rickettsia canadensis* McKiel |
| 101.1 | 1.2 | 1.3 | 1374 | 0.14 | 0.25 | *Rickettsia conorii* Malish |
| 124.2 | 1.4 | 1.5 | 1400 | 0.16 | 0.31 | *Rickettsia felis* |
| 63.1 | 1.2 | 1.3 | 1297 | 0.11 | 0.21 | *Rickettsia heilongjiangensis* |
| 67 | 1.1 | 1.3 | 971 | 0.10 | 0.21 | *Rickettsia japonica* |
| 67.9 | 1.2 | 1.4 | 968 | 0.10 | 0.25 | *Rickettsia massiliae* |
| 66.3 | 1.2 | 1.3 | 927 | 0.09 | 0.21 | *Rickettsia peacockii* Rustic |
| 60.2 | 1.1 | 1.1 | 843 | 0.09 | 0.22 | *Rickettsia prowazekii* Madrid *E* |
| 58.7 | 1.2 | 1.3 | 1343 | 0.11 | 0.21 | *Rickettsia rickettsii* SheilaSmith |
| 68.5 | 1.2 | 1.3 | 1382 | 0.12 | 0.22 | *Rickettsia rickettsii* Iowa |
| 56.8 | 1.1 | 1.1 | 837 | 0.09 | 0.21 | *Rickettsia typhi* Wilmington |
